# Supplementary material for: Investigation of the exceptional charge performance of the 0.93Li4−xMn2O5–0.07Li2O composite cathode for Li-ion batteries
Source: Royal Society of Chemistry journal article supplement (doi:10.1039/c8ta00234g), 2018-01-01
Supplement: c8ta00234g1.pdf [file c8ta00234g1.pdf]

## Supporting Information

### Investigation of the exceptional charge performances of $\text{Li}_{4-x}\text{Mn}_2\text{O}_5$ as Li-ion Battery electrode material

M. Freire<sup>a,e</sup>, M. Diaz-Lopez<sup>b,c</sup>, P. Bordet<sup>b,c</sup>, C. V. Colin<sup>b,c</sup>, O.I. Lebedev<sup>a</sup>, N.V. Kosova<sup>d</sup>, C. Jordy<sup>e</sup>, D. Chateigner<sup>a</sup>, A.L.Chuvilin<sup>f</sup>, A. Maignan<sup>a</sup>, and V. Pralong<sup>a\*</sup>

<sup>a</sup> Laboratoire de Cristallographie et Sciences des Matériaux CRISMAT, ENSICAEN, Normandie Université, CNRS, 6 Bd Maréchal Juin, F-14050 Caen, France. ; <sup>b</sup> Université Grenoble Alpes, Institut Néel, F-38000 Grenoble, France ; <sup>c</sup> CNRS, Institut Néel, F-38000 Grenoble, France; <sup>d</sup> Institute of Solid State Chemistry and Mechanochemistry SB RAS, 18 Kutateladze, Novosibirsk 630128, Russia. ; <sup>e</sup> Saft, Direction de la Recherche, 111/113 Bd Alfred Daney, 33074 Bordeaux, France, <sup>f</sup> CIC nanoGUNE, 20018 Donostia-San Sebastian, Spain.

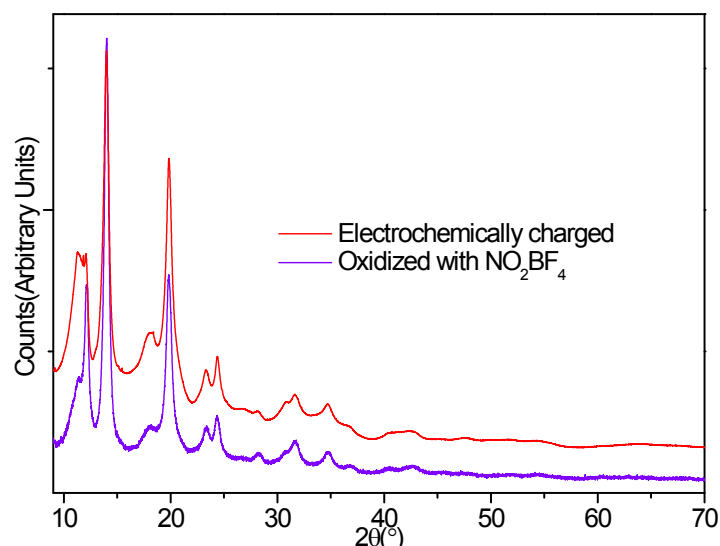

Figure SI-1. X-ray diffraction data for electrochemically charged (red) and chemically oxidized (violet)  $\text{Li}_{4-x}\text{Mn}_2\text{O}_5$ .

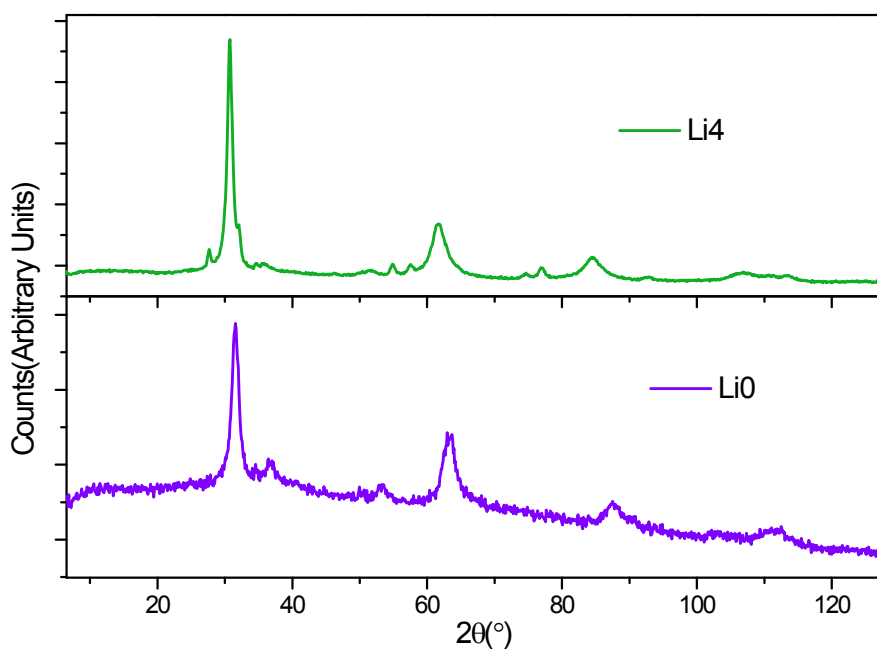

Figure SI-2. Acquired NPD patterns. The  $2\theta$  region of the Rietveld refinements was reduced to the range given in Figure 5 of the main text where peaks are observed.

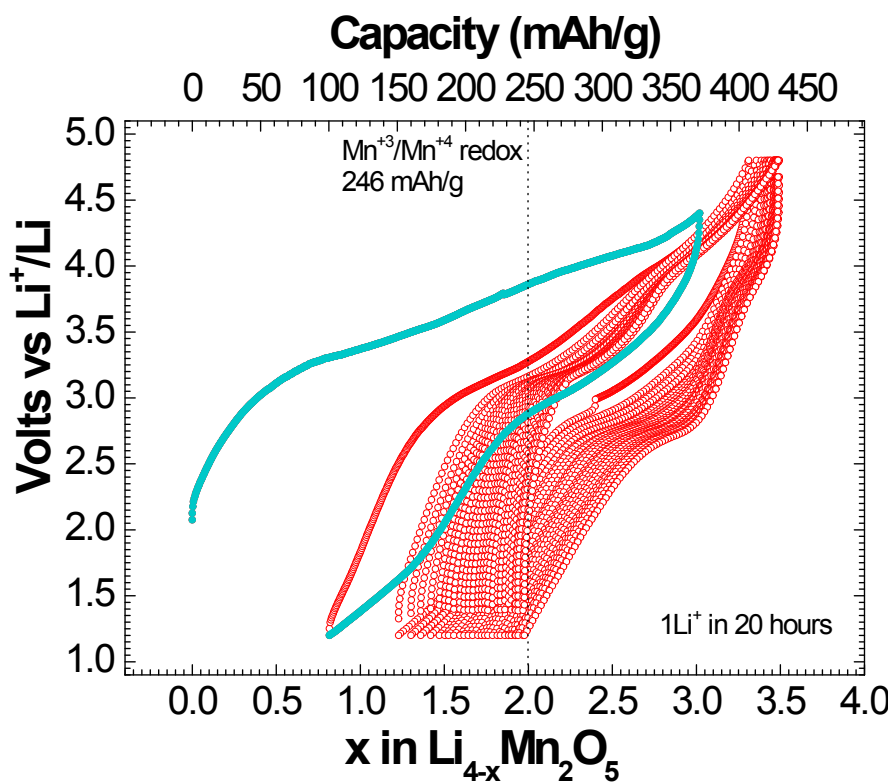

Figure SI-3. Typical voltage-composition profile of  $\text{Li}_4\text{Mn}_2\text{O}_5$  obtained at C/80, in coin cell.

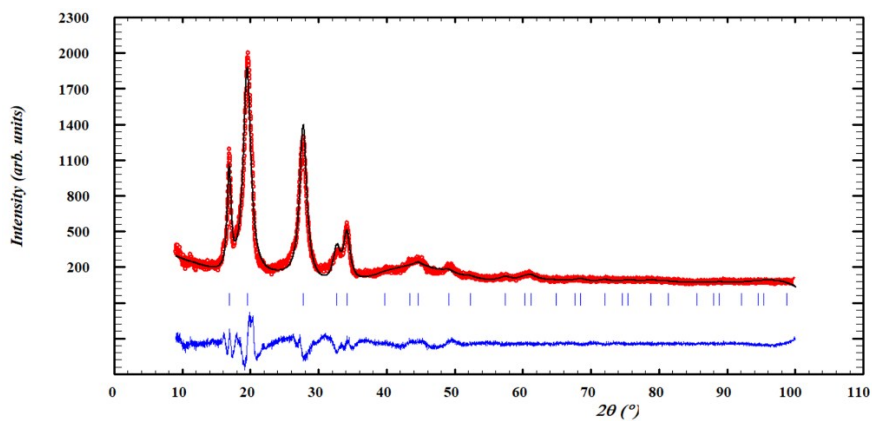

Figure SI-4. Le Bail profile fitting of the X-ray diffraction pattern of  $\text{Li}_{3.6}\text{Mn}_{2.4}\text{O}_{5.4}$  ( $a = 4.17 \text{ \AA}$ ) without any trace of  $\text{Li}_2\text{O}$ . The data was collected with a Bruker D8 Advance diffractometer equipped with a Mo source  $K_{\alpha,1} = 0.7093 \text{ \AA}$ .

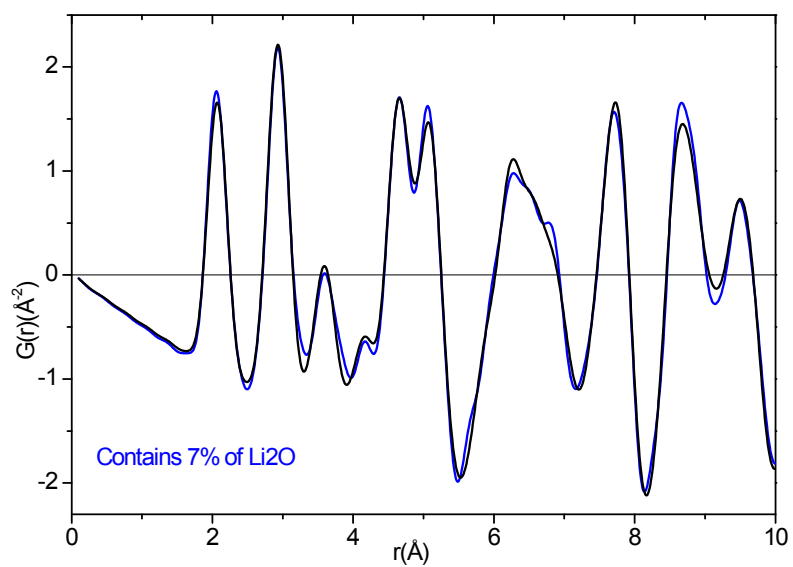

Figure SI-5. PDF simulation of a main  $\text{Li}_4$  phase with an  $\text{MnO}$  structure with (blue) and without (black) 7 wt% of  $\text{Li}_2\text{O}$ .

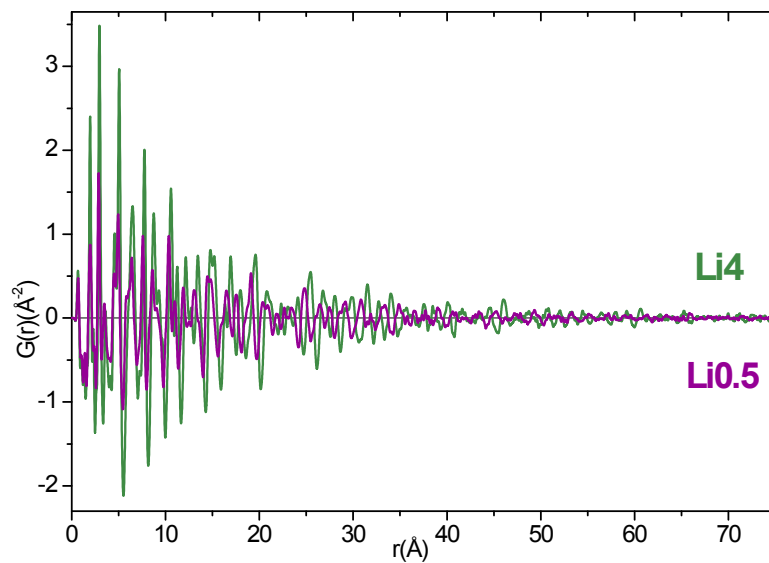

Figure SI-6. PDF data showing a coherent size domain of around 6 nm.

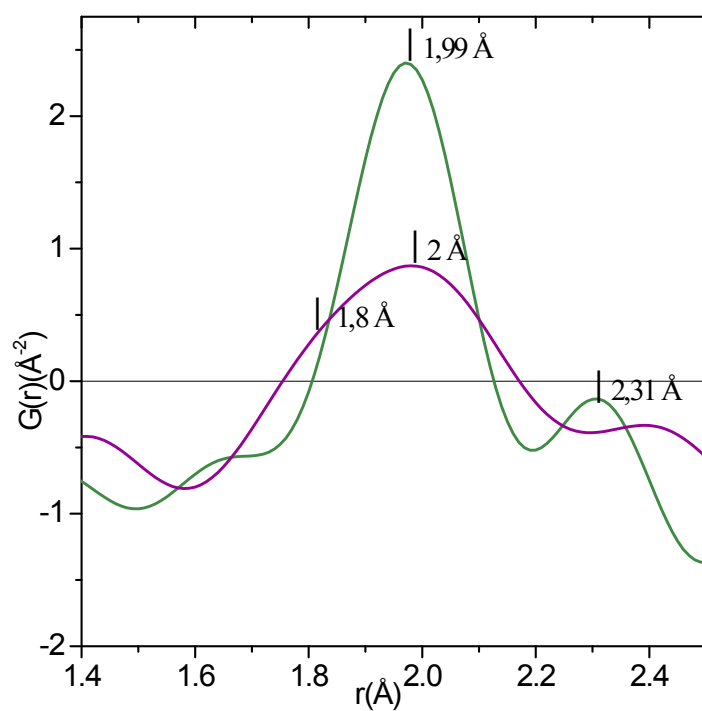

Figure SI-6. First PDF peaks for Li4 (green) and Li0.
